# Supplementary material for: SPION@Cu2−xS nanoclusters for highly sensitive MRI and targeted photothermal therapy of hepatocellular carcinoma
Source: Royal Society of Chemistry journal article supplement (doi:10.1039/c6tb00291a), 2016-01-01
Supplement: c6tb00291a1.pdf [file c6tb00291a1.pdf]

## Supporting Information

### **SPIONs@Cu<sub>2-x</sub>S nanoclusters for highly sensitive MRI and targeted photothermal therapy of hepatocellular carcinoma**

**Xiaolong Liu<sup>1,2</sup>, Xinyi Lin<sup>1,2</sup>, Ming Wu<sup>1,2</sup>, Ruhui Lin<sup>3</sup>, Buhong Li<sup>4\*</sup> and Jingfeng Liu<sup>1,2,5\*</sup>**

<sup>1</sup> The Liver Center of Fujian Province, Fujian Medical University, Fuzhou 350025, P. R. China

<sup>2</sup> The United Innovation of Mengchao Hepatobiliary, Technology Key Laboratory of Fujian Province, Mengchao Hepatobiliary Hospital of Fujian Medical University, Fuzhou 350025, P. R. China

<sup>3</sup> Academy of Integrative Medicine, Fujian University of Traditional Chinese Medicine, Fuzhou 350122, P.R. China.

<sup>4</sup> Key Laboratory of OptoElectronic Science and Technology for Medicine of Ministry of Education, Fujian Provincial Key Laboratory for Photonics Technology, Fujian Normal University, Fuzhou, People's Republic of China

<sup>5</sup> Liver Disease Center, The First Affiliated Hospital of Fujian Medical University, Fuzhou 350005, P. R. China

\* Corresponding Author (correspondence should be address to Buhong Li and Jingfeng Liu),

E-mail addresses: [bhli@fjnu.edu.cn](mailto:bhli@fjnu.edu.cn) , [drjingfeng@126.com](mailto:drjingfeng@126.com)

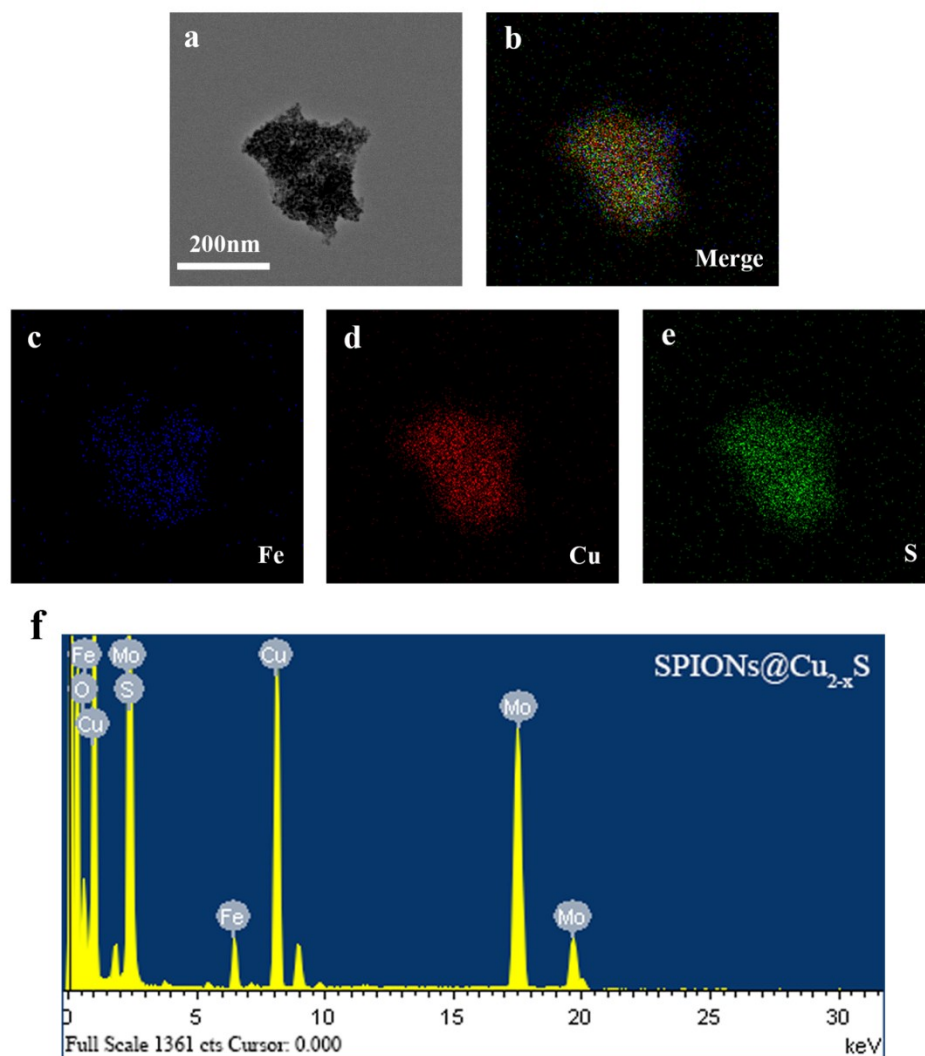

**Fig. S1.** (a) STEM image of SPIONs@Cu<sub>2-x</sub>S aggregates, (b-e) corresponding elemental mappings (b: merged; c: Fe; d: Cu; e: S) of SPIONs@Cu<sub>2-x</sub>S; (f) EDS spectrum of SPIONs@Cu<sub>2-x</sub>S aggregates.

**Table S1.** Corresponding elemental content of SPIONs@Cu<sub>2-x</sub>S aggregates by EDS analysis.

| Element      | Weight percentage (%) | Atom percentage (%) |
|--------------|-----------------------|---------------------|
| O k          | 4.89                  | 18.97               |
| S k          | 8.70                  | 16.85               |
| Fe k         | 2.40                  | 2.66                |
| Cu k         | 21.67                 | 21.17               |
| Mo k         | 62.35                 | 40.35               |
| <b>Total</b> | 100.00                |                     |

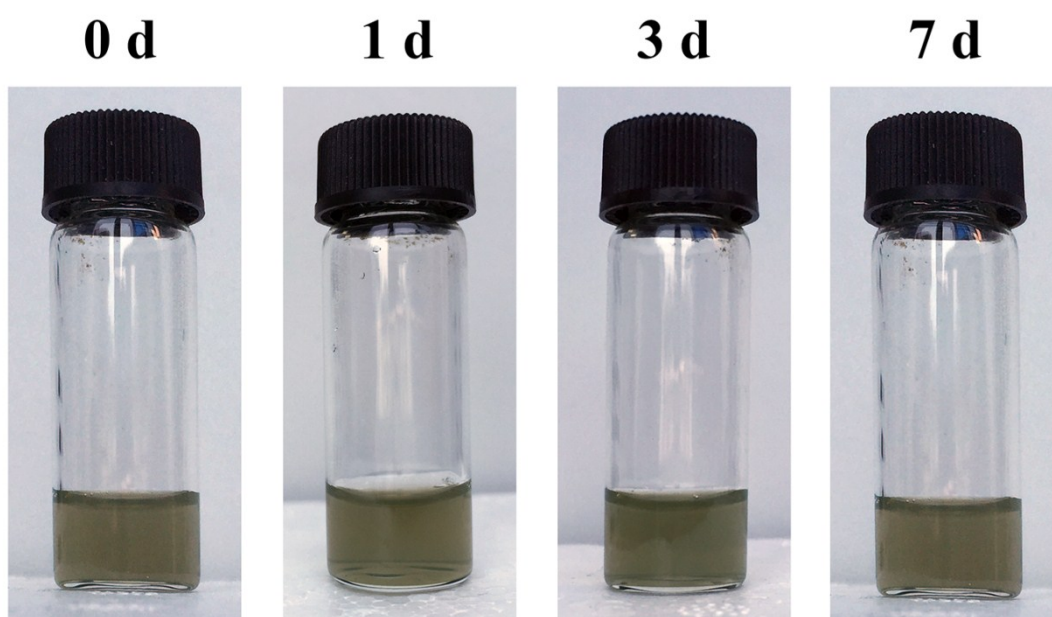

**Fig. S2.** Photographs of SCDP-LA in water for 0, 1, 3, and 7 days, respectively.
